# Supplementary material
Source: publisher site journal article supplement (https://www.dovepress.com/article/465163)
Supplement: Supplementary file 1 [file get_supplementary_file.php]

**Supplementary Material 1**

Survey with the descriptions

First part

- Age
- Sex: Patients were asked to answer their biological sex, namely as female or male.
- Education status: Patients were asked about their highest level of education and classified into the following three groups: Primary school, middle or high school, and college
- Marital status: Patients were asked to describe their current civil status as one of the following: single, married, divorced/widow
- Work status: Patients were asked to describe their current job status: regular worker (it could be a part-time or full-time job, as long as it is permanent), irregular worker, and not-working. Patients who are unemployed, as well as pensioners, were grouped into the not-working group.
- Living conditions: Patients were asked to describe their living conditions subjectively, from a financial and monetary perspective. They were asked to rate their answers as easy, moderate, or difficult.
- Diet type: Patients were informed about the diet types and asked to describe themselves as omnivore, vegetarian, or vegan.
- Access to balanced and healthy food: Patients were asked to describe their financial abilities in order to afford healthy and balanced “perceived” food. They were asked to rate their answers as easy, moderate, or difficult.
- Access to meat and products, dairy products, bakery products, and fresh fruit and vegetables: These four questions were asked of patients to describe their financial abilities in order to afford these food groups. They were asked to answer as easy, moderate, or difficult for each of these food groups.
- Tobacco use: Patients were asked whether they used to smoke, they currently smoke, or they do not smoke.
- Alcohol consumption: Patients were asked whether they drink alcohol regularly, socially, or do not drink.

Second Part

- Height: Patients’ height was measured in the clinic and recorded as centimeters.
- Weight: Patients’ weight was measured in the clinic and recorded as kilograms.
- Body mass index (BMI): calculated as weight in kilograms divided by the square of height in meters. They were both recorded as numerical values and categorical values. BMI <18.5 kg/m2 was recorded as underweight, 18.5-24.9 kg/m2 as normal weight, 25-29.9 kg/m2 as overweight, 30-34.9 kg/m2 as mildly obese, and over 35 kg/m2 as severely obese.
- Comorbidities: Patients were asked about their medical histories. Researcher BCG later grouped them as hypertension, diabetes mellitus, cardiovascular diseases (excluding hypertension), respiratory diseases, liver diseases, kidney diseases, malignancy, rheumatological diseases, neuropsychiatric diseases, and endocrinologic and metabolic diseases (including diabetes mellitus). The number of comorbidities was also recorded.

Third Part

- Verbal weight perception: We used an assessment method similar to one that is used by a recent study (18) Patients were asked to describe themselves as one of the following: underweight, normal-weighted, overweight, mildly obese, or severely obese. This question was read twice to make sure patients comprehended it correctly.
- Visual weight perception: A previously developed and validated body size guide (BSG) was used for visual perception analysis (25). This BSG has two different guides for male and female participants. In each BSG, the same male or female model’s image is pictured, from his or her underweight body to a severely obese body. There are 10 pictures for each sex. The first image represents underweight, the second and third images represent normal weight, the fourth image represents overweight, the fifth and sixth images represent class I obesity, the seventh and eighth images represent class II obesity, and the final two images represent class III obesity. Since we had grouped the obese patients’ BMI dichotomously as mildly obese or severely obese, and the verbal weight perception question’s obesity classification was also dichotomous as mildly obese or severely obese, we counted the visual weight perception question’s seventh image into the mildly obese group and the eighth image into the severely obese group, according to the patients' answers. Patients were shown the images according to their sex and were asked to point out the image they found most similar to themselves. Patients were asked to look at all images slowly and thoroughly. Researcher BCE described that all images belong to the same person but vary in size from underweight to severe obesity.

**Supplementary Material 2**

Misperception and Classification:

Five subgroups (SG) for thinner (t) or fatter (f) perception, named t-SG and f-SG, respectively, were created to encompass all possibilities.

- t-SG1, no thinner (or fatter for f-SG1) than reality misperception: The patient does not perceive themselves as thinner (or fatter for f-SG1) than reality, both verbally and visually. However, they could perceive accurately or fatter (or thinner for f-SG1) that reality.
- t-SG2, visual misperception, verbal accurate perception: The patient perceives themselves thinner (or fatter for f-SG2) than reality on the BSG chart but answers the verbal weight perception question appropriately.
- t-SG3, verbal misperception, visual accurate perception: The patient perceives themselves thinner (o or fatter for f-SG3) than reality when the verbal weight perception question is asked, but points out an appropriate image on the BSG chart.
- t-SG4, both visual and verbal misperception: The patient perceives themselves as thinner (or fatter for f-SG4) than reality when the verbal weight perception question is asked and points to a thinner (or fatter for f-SG4) than reality image on the BSG chart.
- SG5, visual and verbal misperceptions oppose: The patient perceives themselves as thinner (or fatter) than reality when the verbal weight perception question is asked and points to a fatter (or thinner) than reality image on the BSG chart, or vice versa.

Two of the three main misperception groups created were “thinner than reality misperception” (TTRM) and “fatter than reality misperception” (FTRM), in which subgroups 2, 3, and 4 were included (t-SG2, t-SG3, and t-SG4 for TTRM, and f-SG2, f-SG3, and f-SG4 for FTRM). Since SG5 contained opposite and conflicting answers, it is not included either in the TTRM or FTRM groups. However, since they also span a misperception, they were included in a third group named “either thinner or fatter than reality misperception” (ETFTRM), a group containing any kind of misperception, which is calculated as patients with appropriate perception subtracted from all patients.
